# Supplementary material for: Hospital volume, proportion resected and mortality from oesophageal and gastric cancer: a population-based study in England, 2004–2008
Source: HighWire-hosted journal article supplement (doi:10.1136/gutjnl-2012-303008), 2012-10-19
Supplement: gutjnl-2012-303008supp_table1.pdf [file gutjnl-2012-303008supp_table1.pdf]

Table A1: PedsQL total score by Wave of data collection

|        | NO-TYA-PTC |               |                        | SOME-TYA-PTC |               |                        | ALL-TYA-PTC |               |                        |
|--------|------------|---------------|------------------------|--------------|---------------|------------------------|-------------|---------------|------------------------|
|        | N          | Mean (SD)     | Median (IQR)           | N            | Mean (SD)     | Median (IQR)           | N           | Mean (SD)     | Median (IQR)           |
| Wave 1 | 276        | 71.44 (19.68) | 73.22 (57.61 to 89.13) | 312          | 60.79 (18.79) | 59.71 (47.52 to 75.00) | 193         | 65.44 (19.07) | 66.30 (52.78 to 80.56) |
| Wave 2 | 173        | 77.55 (19.31) | 83.70 (61.96 to 93.48) | 209          | 69.46 (19.45) | 71.74 (54.35 to 85.87) | 122         | 73.50 (19.08) | 77.17 (58.33 to 88.04) |
| Wave 3 | 126        | 79.62 (20.38) | 85.87 (68.48 to 95.65) | 164          | 71.33 (18.91) | 73.76 (59.75 to 84.78) | 99          | 74.55 (19.26) | 80.43 (59.72 to 91.30) |
| Wave 4 | 121        | 78.21 (21.16) | 84.78 (64.13 to 95.65) | 118          | 73.30 (33.33) | 76.24 (60.87 to 86.96) | 98          | 75.90 (21.27) | 82.61 (61.96 to 93.48) |
| Wave 5 | 103        | 80.71 (18.75) | 86.96 (71.74 to 95.65) | 113          | 76.21 (18.90) | 78.26 (65.22 to 93.48) | 75          | 79.70 (16.78) | 85.87 (70.65 to 91.30) |
